# Supplementary material for: Tau filaments from amyotrophic lateral sclerosis/parkinsonism-dementia complex adopt the CTE fold
Source: PubMed Central journal article supplement (PMC10743375; doi:10.1073/pnas.2306767120), 2023-12-15
Supplement: pnas.2306767120.sapp.pdf [file pnas.2306767120.sapp.pdf]

## Supporting Information for

### Tau Filaments from Amyotrophic Lateral Sclerosis/Parkinsonism-Dementia Complex (ALS/PDC) adopt the CTE Fold

Chao Qi<sup>1\*</sup>, Bert M. Verheijen<sup>2\*</sup>, Yasumasa Kokubo<sup>3\*</sup>, Yang Shi<sup>1,11\*</sup>, Stephan Tetter<sup>1</sup>, Alexey G. Murzin<sup>1</sup>, Asa Nakahara<sup>4</sup>, Satoru Morimoto<sup>5</sup>, Marc Vermulst<sup>2</sup>, Ryogen Sasaki<sup>6</sup>, Eleonora Aronica<sup>7</sup>, Yoshifumi Hirokawa<sup>5</sup>, Kiyomitsu Oyanagi<sup>8</sup>, Akiyoshi Kakita<sup>4</sup>, Benjamin Ryskeldi-Falcon<sup>1</sup>, Mari Yoshida<sup>9</sup>, Masato Hasegawa<sup>10</sup>, Sjors H.W. Scheres<sup>1@</sup>, Michel Goedert<sup>1@</sup>

<sup>1</sup> Medical Research Council, Laboratory of Molecular Biology, Cambridge, CB2 0QH, UK

<sup>2</sup> Leonard Davis School of Gerontology, University of Southern California, Los Angeles, CA 90089, USA

<sup>3</sup> Graduate School of Regional Innovation Studies, Mie University, Tsu, 514-8507, Japan

<sup>4</sup> Department of Pathology, Brain Research Institute, Niigata University, Niigata, 951-8585, Japan

<sup>5</sup> Department of Oncologic Pathology, Graduate School of Medicine, Mie University, Tsu, 514-8507, Japan

<sup>6</sup> Department of Nursing, Suzuka University of Medical Science, Suzuka, 513-8670, Japan

<sup>7</sup> Department of Neuropathology, Amsterdam University Medical Centers (UMC), University of Amsterdam, Amsterdam Neuroscience, 1105 AZ, Amsterdam, The Netherlands

<sup>8</sup> Department of Brain Disease Research, Shinshu University School of Medicine, Matsumoto, 390-8621, Japan

<sup>9</sup> Department of Neuropathology, Institute for Medical Science of Aging, Aichi Medical University, Nagakute, 480-1195, Japan

<sup>10</sup> Department of Brain and Neuroscience, Tokyo Metropolitan Institute of Medical Science, Tokyo, 156-8506, Japan

<sup>11</sup> Current address: Liangzhu Laboratory, Ministry of Education Frontier Science Center for Brain Science and Brain-machine Integration, State Key Laboratory of Brain-machine Intelligence, Zhejiang University, 1369 West Wenyi Road, Hangzhou 311121, China

\* These authors contributed equally

@ Correspondence to: [scheres@mrc-lmb.cam.ac.uk](mailto:scheres@mrc-lmb.cam.ac.uk); [mg@mrc-lmb.cam.ac.uk](mailto:mg@mrc-lmb.cam.ac.uk)

#### This PDF file includes:

Figures S1 to S7

Tables S1 to S3

# SUPPLEMENTARY FIGURES

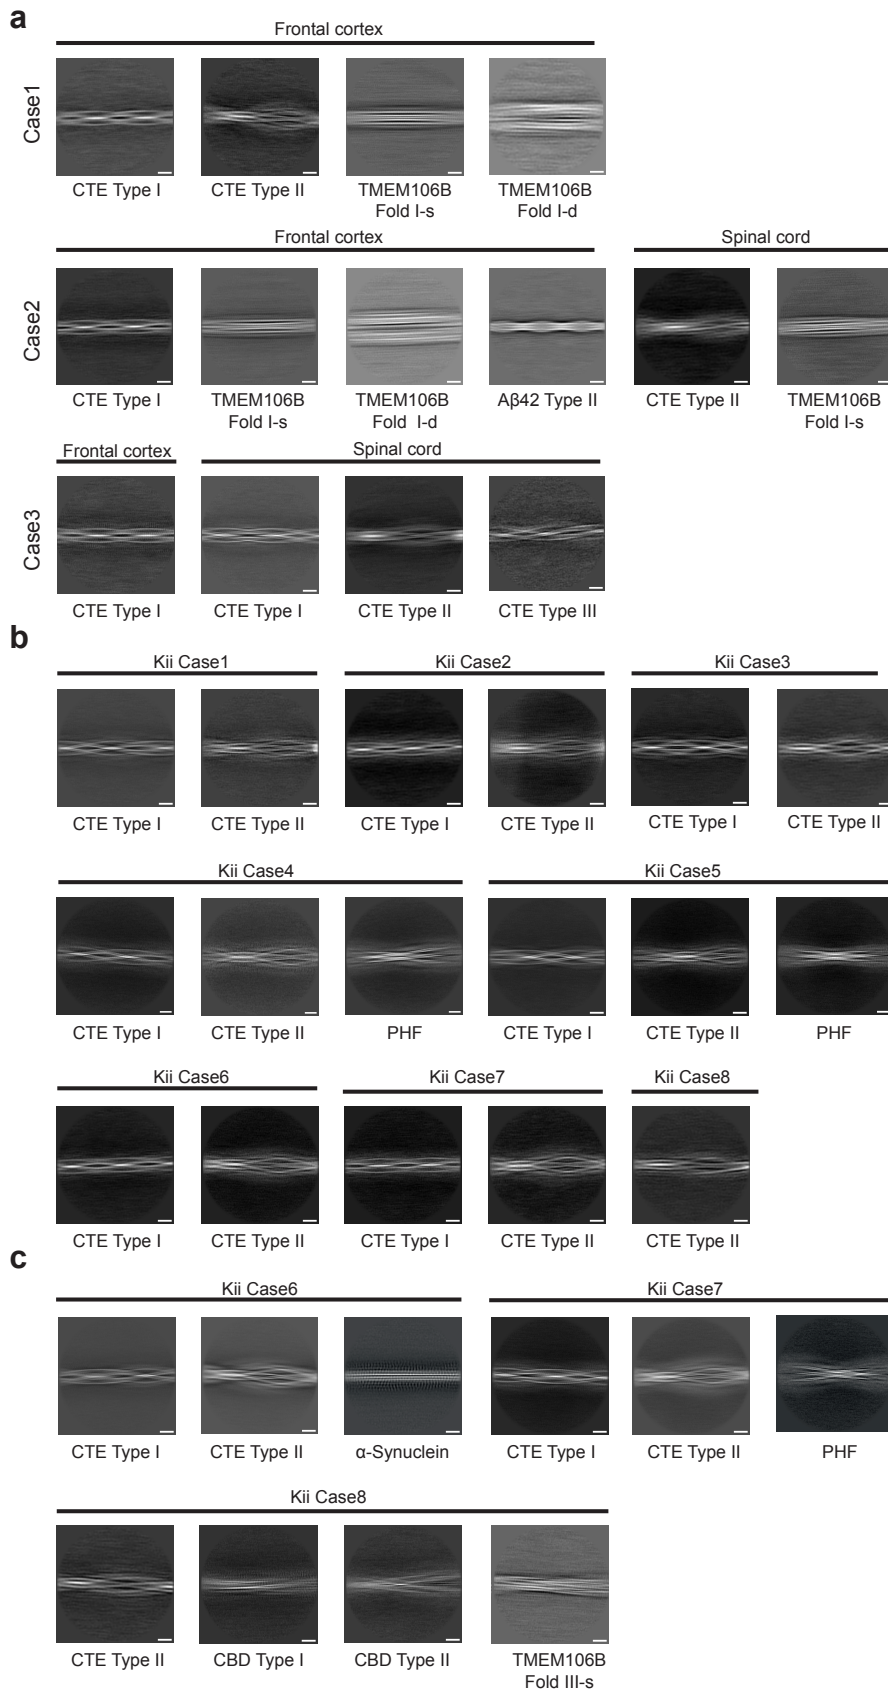



**Supplementary Figure 1: Two-dimensional classification of filaments from Guam (a) and Kii (b) ALS/PDC.**  
Scale bar, 10 nm.

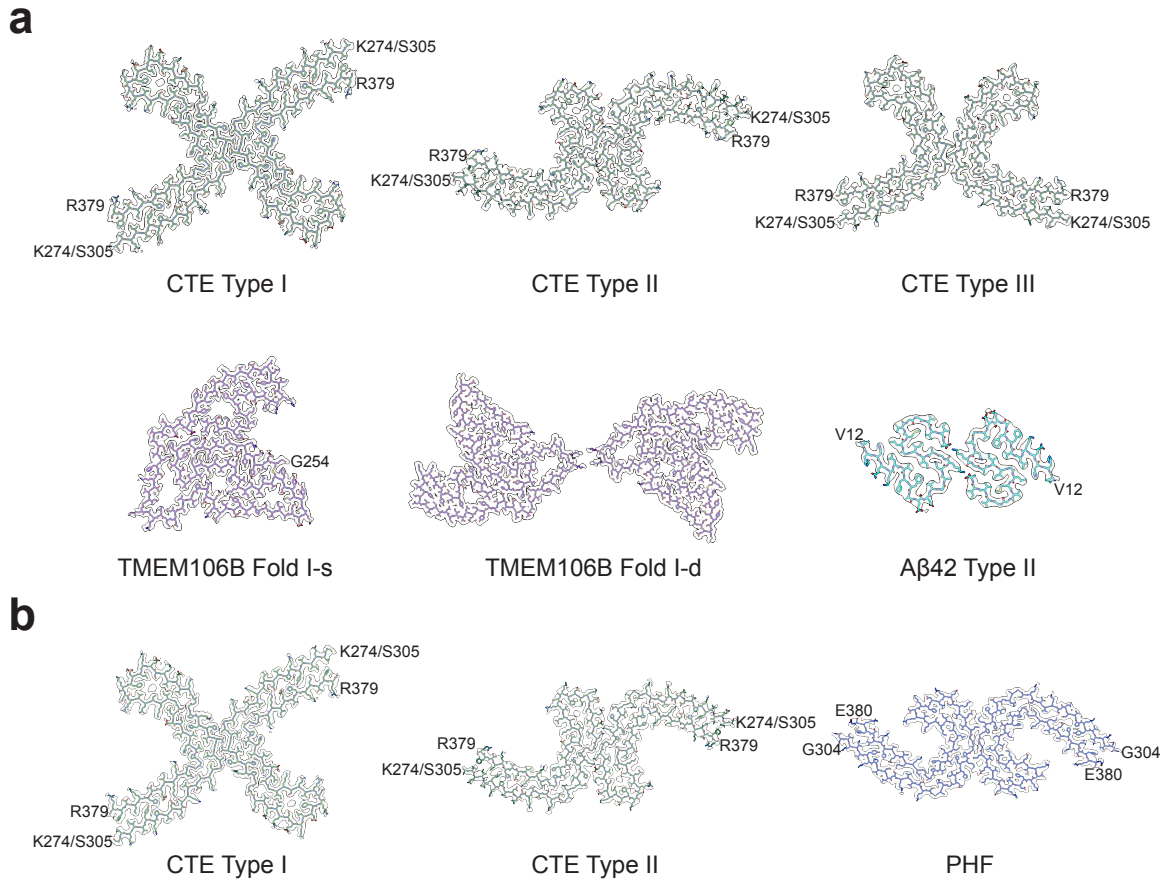

**Supplementary Figure 2: Cryo-EM density maps of filaments from Guam and Kii ALS/PDC.**

**(a)**, In Guam ALS/PDC, Type I, Type II and Type III tau filaments (green), singlets and doublets of TMEM106B filaments (fold I) (purple) and Type II A $\beta$ 42 filaments (cyan) were present.

**(b)**, In Kii ALS/PDC, Type I and Type II tau filaments (green), as well as tau paired helical filaments (PHFs) (blue), were present.

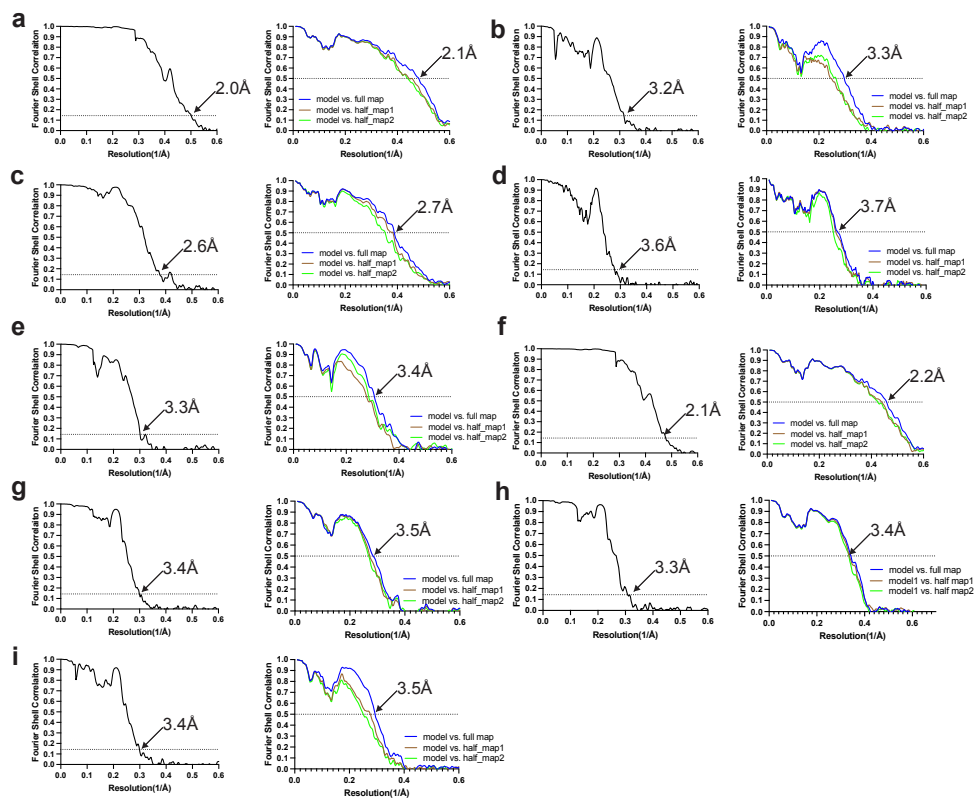

### Supplementary Figure 3: Fourier shell correlation (FSC) curves.

FSC curves of cryo-EM maps (left panel) and model to map validation (right panel). **(a)**, Guam ALS/PDC CTE tau Type I. **(b)**, Guam ALS/PDC CTE tau Type II. **(c)**, Guam ALS/PDC TMEM106B fold I-s. **(d)**, Guam ALS/PDC TMEM106B fold I-d. **(e)**, Guam ALS/PDC CTE tau Type II A $\beta$ 42. **(f)**, Kii ALS/PDC CTE tau Type I. **(g)**, Kii ALS/PDC CTE tau Type II. **(h)**, Kii ALS/PDC tau PHF. **(i)**, Guam ALS/PDC CTE tau Type III.

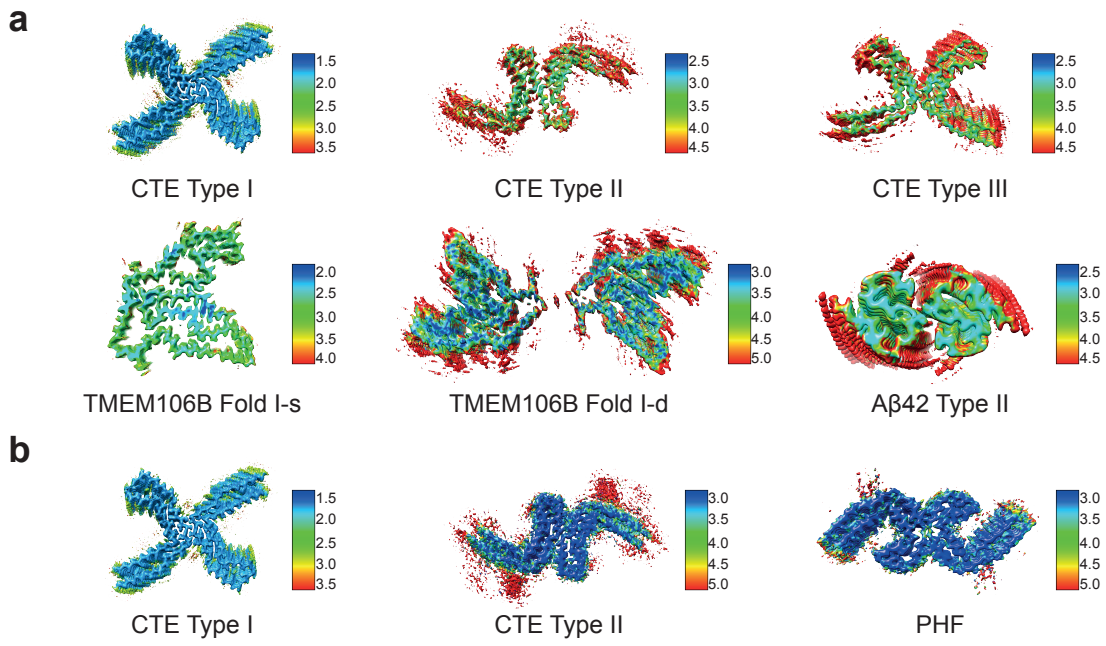

**Supplementary Figure 4: Local resolution estimation of filaments from Guam (a) and Kii (b) ALS/PDC.**

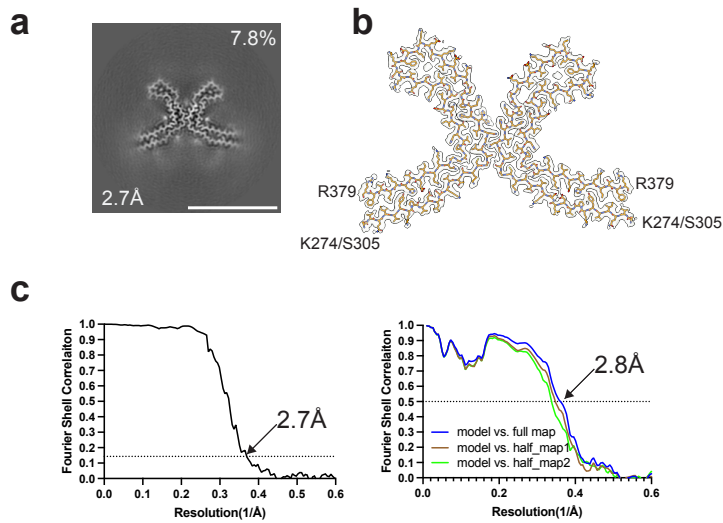

### Supplementary Figure 5: Type III filaments from CTE.

**(a)**, Cross-section perpendicular to the helical axis of the cryo-EM structure of Type III filaments from temporal cortex of CTE case 2 (30), with a projected thickness of approximately one rung along the helical axis. Scale bar, 10 nm. **(b)**, Cryo-EM density map and model of Type III filament. **(c)**, Fourier shell correlation curves of cryo-EM maps of Type III filaments (left panel) and model to map validation (right panel).

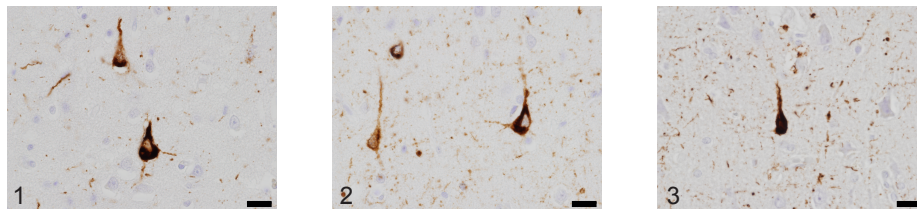

**Supplementary Figure 6: Immunostaining of tau inclusions from Guam ALS/PDC.**

Sections from the frontal cortex of cases 1-3 stained with anti-tau antibody AT8. Scale bar, 20  $\mu\text{m}$ .

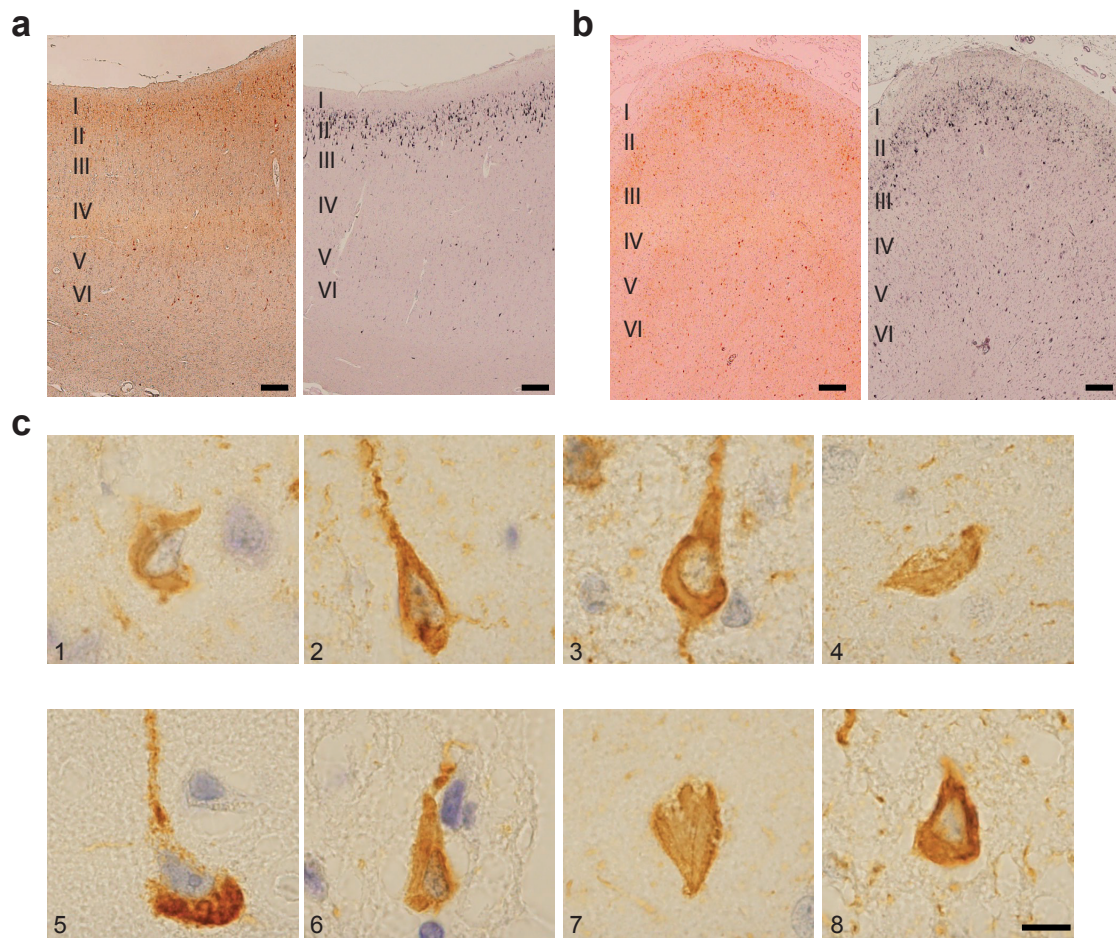

**Supplementary Figure 7: Immunostaining of tau inclusions from Kii ALS/PDC.**

**(a,b)**, Temporal cortex from cases 3 and 4 stained with anti-tau antibody AT8 (left) and with Gallyas-Braak silver (right). Tau inclusions are concentrated in layers II/III. Scale bar, 200  $\mu\text{m}$ .

**(c)**, Sections from the temporal cortex of cases 1-8 stained with AT8. Scale bar, 10  $\mu\text{m}$ .



## SUPPLEMENTARY TABLES

**Supplementary Table 1: Cases of ALS/PDC.**

|      | Case number | Sex | Age at death (year) | Duration of illness (year) | Clinical subtype |
|------|-------------|-----|---------------------|----------------------------|------------------|
| Guam | 1           | M   | 68                  | 11                         | PDC              |
|      | 2           | M   | 73                  | 13                         | PDC              |
|      | 3           | F   | 73                  | 9                          | PDC              |
| Kii  | 1           | F   | 63                  | 5                          | ALS              |
|      | 2           | M   | 77                  | 2                          | ALS              |
|      | 3           | F   | 60                  | 9                          | PDC              |
|      | 4           | F   | 70                  | 12                         | PDC              |
|      | 5           | F   | 76                  | 1                          | ALS              |
|      | 6           | F   | 74                  | 14                         | PDC              |
|      | 7           | M   | 74                  | 7                          | PDC              |
|      | 8           | F   | 71                  | 14                         | PDC              |

\*Guam cases (1-3) have not been published before. Kii cases 1-8 correspond to cases 1,8,9,10,7,14,15 and 12 in (11).

**Supplementary Table 2: Cryo-EM data collection, refinement and validation statistics for Guam ALS/PDC.**

|                                                  | Guam Case3 spinal cord |             | Guam Case1 frontal cortex |                      | Guam Case2 frontal cortex |             |
|--------------------------------------------------|------------------------|-------------|---------------------------|----------------------|---------------------------|-------------|
| <b>Data collection</b>                           |                        |             |                           |                      |                           |             |
| Microscope                                       | Titan Krios            |             | Titan Krios               |                      | Titan Krios               |             |
| Voltage (kV)                                     | 300                    |             | 300                       |                      | 300                       |             |
| Detector                                         | Falcon4                |             | Falcon4                   |                      | Falcon4                   |             |
| Magnification                                    | 96,000                 |             | 96,000                    |                      | 96,000                    |             |
| Electron exposure (e-/Å <sup>2</sup> )           | 40                     |             | 40                        |                      | 40                        |             |
| Defocus range (µm)                               | -1.0 to -2.0           |             | -1.0 to -2.0              |                      | -1.0 to -2.0              |             |
| Pixel size (Å)                                   | 0.824                  |             | 0.824                     |                      | 0.824                     |             |
| <b>Data processing</b>                           | CTE TypeI              | CTE TypeIII | CTE type II               | TMEM106B<br>Fold I-s | TMEM106B<br>Fold I-d      | Aβ42 TypeII |
| Box size (pixel)                                 | 400                    | 400         | 400                       | 400                  | 400                       | 400         |
| Symmetry imposed                                 | C1                     | C1          | C1                        | C1                   | C1                        | C2          |
| Initial particle images (no.)                    | 256,999                |             | 130,240                   |                      | 281,921                   |             |
| Final particle images (no.)                      | 140,124                | 13,456      | 3,105                     | 57,802               | 11,131                    | 20,363      |
| Map resolution (Å)<br>FSC threshold 0.143        | 2.0                    | 3.4         | 3.2                       | 2.6                  | 3.6                       | 3.3         |
| Helical rise (Å)                                 | 2.37                   | 4.74        | 2.38                      | 4.81                 | 4.79                      | 4.79        |
| Helical twist (°)                                | 179.41                 | -1.19       | 179.4                     | -0.4                 | -0.42                     | -2.99       |
| <b>Refinement</b>                                |                        |             |                           |                      |                           |             |
| Model resolution (Å)<br>FSC threshold 0.5        | 2.1                    | 3.5         | 3.3                       | 2.7                  | 3.7                       | 3.4         |
| Map sharpening <i>B</i> factor (Å <sup>2</sup> ) | -26                    | -54         | -30                       | -28                  | -69                       | -43         |
| Model composition                                |                        |             |                           |                      |                           |             |
| Non-hydrogen atoms                               | 2870                   | 3444        | 3444                      | 4340                 | 8680                      | 1356        |
| Protein residues                                 | 375                    | 450         | 450                       | 540                  | 1080                      | 186         |
| Ligands                                          | 0                      | 0           | 0                         | 0                    | 0                         | 0           |
| <i>B</i> factors (Å <sup>2</sup> )               |                        |             |                           |                      |                           |             |
| Protein                                          | 104.2                  | 196.3       | 312.4                     | 141.1                | 222.2                     | 156.8       |
| R.m.s. deviations                                |                        |             |                           |                      |                           |             |
| Bond lengths (Å)                                 | 0.004                  | 0.007       | 0.0056                    | 0.0056               | 0.0071                    | 0.0073      |
| Bond angles (°)                                  | 1.006                  | 1.541       | 1.11                      | 1.367                | 1.537                     | 1.369       |
| Validation                                       |                        |             |                           |                      |                           |             |
| MolProbity score                                 | 0.95                   | 2.06        | 1.39                      | 2.21                 | 2.54                      | 2.17        |
| Clashscore                                       | 0.51                   | 3.56        | 1.99                      | 4.15                 | 5.19                      | 4.71        |
| Poor rotamers (%)                                | 1.52                   | 6.82        | 1.52                      | 4.76                 | 5.95                      | 4.35        |
| Ramachandran plot                                |                        |             |                           |                      |                           |             |
| Favored (%)                                      | 97.26                  | 95.89       | 95.89                     | 91.73                | 84.21                     | 93.1        |
| Allowed (%)                                      | 2.74                   | 4.11        | 4.11                      | 8.27                 | 15.79                     | 6.9         |
| Disallowed (%)                                   | 0                      | 0           | 0                         | 0                    | 0                         | 0           |
| PDB                                              | 8OT6                   | 8OT9        | 8OTC                      | 8OTD                 | 8OTE                      | 8OTF        |
| EMDB                                             | EMD-17171              | EMD-17173   | EMD-17174                 | EMD-17175            | EMD-17176                 | EMD-17177   |

**Supplementary Table 3: Cryo-EM data collection, refinement and validation statistics for Kii ALS/PDC and CTE.**

|                                                  | Kii Case5    |            |           | CTE Case2    |
|--------------------------------------------------|--------------|------------|-----------|--------------|
| <b>Data collection</b>                           |              |            |           |              |
| Microscope                                       | Titan Krios  |            |           | Titan Krios  |
| Voltage (kV)                                     | 300          |            |           | 300          |
| Energy filter slit (eV)                          | 20           |            |           | 20           |
| Detector                                         | K3           |            |           | Falcon4      |
| Magnification                                    | 105,000      |            |           | 96,000       |
| Electron exposure (e-/Å <sup>2</sup> )           | 40           |            |           | 40           |
| Defocus range (µm)                               | -1.0 to -2.0 |            |           | -1.2 to -2.4 |
| Pixel size (Å)                                   | 0.826        |            |           | 0.824        |
| <b>Data processing</b>                           | CTE typeI    | CTE typeII | PHF       | CTE Type III |
| Box size (pixel)                                 | 400          | 400        | 400       | 256          |
| Symmetry imposed                                 | C1           | C1         | C1        | C1           |
| Initial particle images (no.)                    | 414,439      |            |           | 538,420      |
| Final particle images (no.)                      | 181,144      | 33,337     | 39,424    | 41,955       |
| Map resolution (Å)<br>FSC threshold 0.143        | 2.1          | 3.4        | 3.3       | 2.7          |
| Helical rise (Å)                                 | 2.39         | 2.39       | 2.38      | 4.78         |
| Helical twist (°)                                | 179.39       | 179.36     | 179.45    | -1.14        |
| <b>Refinement</b>                                |              |            |           |              |
| Model resolution (Å)<br>FSC threshold 0.5        | 2.2          | 3.5        | 3.4       | 2.8          |
| Map sharpening <i>B</i> factor (Å <sup>2</sup> ) | -31          | -84        | -73       | -55          |
| Model composition                                |              |            |           |              |
| Non-hydrogen atoms                               | 2870         | 2870       | 4109      | 3444         |
| Protein residues                                 | 375          | 375        | 539       | 450          |
| Ligands                                          | 0            | 0          | 0         | 0            |
| <i>B</i> factors (Å <sup>2</sup> )               |              |            |           |              |
| Protein                                          | 101.6        | 247.6      | 238.6     | 199.6        |
| R.m.s. deviations                                |              |            |           |              |
| Bond lengths (Å)                                 | 0.0063       | 0.0065     | 0.0067    | 0.0103       |
| Bond angles (°)                                  | 0.91         | 1.378      | 1.593     | 1.517        |
| Validation                                       |              |            |           |              |
| MolProbity score                                 | 1.3          | 2.15       | 2.53      | 1.81         |
| Clashscore                                       | 1.02         | 8.88       | 7.78      | 3.27         |
| Poor rotamers (%)                                | 3.03         | 1.52       | 4.48      | 5.30         |
| Ramachandran plot                                |              |            |           |              |
| Favored (%)                                      | 97.26        | 90.41      | 87.62     | 97.26        |
| Allowed (%)                                      | 2.74         | 9.59       | 12.38     | 5.30         |
| Disallowed (%)                                   | 0            | 0          | 0         | 0            |
| PDB                                              | 8OTG         | 8OTH       | 8OTJ      | 8OTI         |
| EMDB                                             | EMD-17178    | EMD-17179  | EMD-17181 | EMD-17180    |
